1 **Heart Rate Variability Covaries with Amygdala Functional Connectivity During**  
2 **Voluntary Emotion Regulation**

3 Emma Tupitsa<sup>1</sup>, Ifeoma Egbuniwe<sup>1</sup>, William K. Lloyd<sup>1,2</sup>, Marta Puertollano<sup>1</sup>, Birthe

4 Macdonald<sup>1,3</sup>, Karin Joanknecht<sup>1</sup>, Michiko Sakaki<sup>4,5</sup>, Carien M. van Reekum<sup>1</sup>

5

6 <sup>1</sup>Centre for Integrative Neuroscience and Neurodynamics, School of Psychology and

7 Clinical Language Sciences, University of Reading, Reading, UK

8 <sup>2</sup>School of Health Sciences, University of Manchester, Manchester, UK

9 <sup>3</sup>URPP Dynamics of Healthy Ageing, University of Zurich, Zurich, Switzerland

10 <sup>4</sup>Hector Research Institute of Education Sciences and Psychology, University of

11 Tübingen, Tübingen, Germany

12 <sup>5</sup>Research Institute, Kochi University of Technology, Kochi, Japan.

13

14

15 Correspondence:

16 Carien van Reekum

17 Centre for Integrative Neuroscience and Neurodynamics

18 School of Psychology and Clinical Language Sciences

19 University of Reading

20 Earley Gate, Whiteknights Campus

21 RG6 6AH, Reading

22 United Kingdom

23 [c.vanreecum@reading.ac.uk](mailto:c.vanreecum@reading.ac.uk)

24  
25  
26  
27  
28  
29  
30  
31  
32  
33  
34  
35  
36  
37  
38  
39  
40  
41  
42  
43  
44  
45  
46  
47  
48

## Abstract

The Neurovisceral Integration Model posits that shared neural networks support the effective regulation of emotions and heart rate, with heart rate variability (HRV) serving as an objective, peripheral index of prefrontal inhibitory control. Prior neuroimaging studies have predominantly examined both HRV and associated neural functional connectivity at rest, as opposed to contexts that require active emotion regulation. The present study sought to extend upon previous resting-state functional connectivity findings, examining HRV and corresponding amygdala functional connectivity during a cognitive reappraisal task. Seventy adults (52 old and 18 young adults, 18-84 years, 51% male) received instructions to cognitively reappraise negative and neutral affective images during functional MRI scanning. HRV measures were derived from a finger pulse signal throughout the scan. During the task, young adults exhibited a significant inverse association between HRV and amygdala-medial prefrontal cortex (mPFC) functional connectivity, in which higher HRV was correlated with weaker amygdala-mPFC coupling, whereas old adults displayed a slight positive, albeit non-significant correlation. Furthermore, voxelwise whole-brain functional connectivity analyses showed that higher HRV was linked to weaker right amygdala-posterior cingulate cortex connectivity across old and young adults, and in old adults, higher HRV positively correlated with stronger right amygdala – right ventrolateral prefrontal cortex connectivity. Collectively, these findings highlight the importance of assessing HRV and neural functional connectivity during active regulatory contexts to further identify neural concomitants of HRV and adaptive emotion regulation.

**Keywords:** Heart rate variability, neurovisceral integration model, amygdala, medial prefrontal cortex, functional connectivity

49

## 1. Introduction

50           The ability to flexibly respond to ongoing and complex changes in our  
51 environment, in both a timely and contextually appropriate manner, is crucial for  
52 successful adaptation to environmental challenges and emotion regulation (Aldao et  
53 al., 2015; Thompson, 1994). Responses to such situational demands generates a  
54 cascade of changes at both subjective (e.g., emotional states, expressions) and  
55 physiological (e.g., elevations or reductions to heart rate, sweating, heightened neural  
56 responding) levels. Heart Rate Variability (HRV), physiologically defined as the  
57 variation in time intervals between consecutive heart beats, has increasingly been  
58 employed as an objective, peripheral measure to capture individual differences in  
59 adaptive autonomic responding and self-regulatory capacity, including emotion  
60 regulation (Appelhans & Luecken, 2006).

61           HRV reflects the predominance of the parasympathetic branch of the  
62 autonomic nervous system (ANS). Both the sympathetic and parasympathetic  
63 branches directly innervate the heart via the stellate ganglia and vagus nerve  
64 respectively (Berntson et al., 1997). Dynamic interplay between both branches  
65 produces complex variations in the heart rate period that is captured by HRV, but it is  
66 the fast, modulatory impact of the parasympathetic nervous system (via the vagus  
67 nerve) that reportedly exhibits the strongest influence on the heart's pace maker (i.e.,  
68 sinoatrial node) and subsequent variation in heart rate, particularly at rest (Berntson  
69 et al., 1997). Typically, the higher the HRV, the more adaptive and responsive the  
70 cardiovascular system is, supporting fast and flexible alterations in physiological  
71 responses to effectively manage stressors, as well as maintaining homeostasis  
72 (Shaffer & Ginsberg, 2017; but see Kogan et al., 2013 for discussion on the quadratic  
73 nature of HRV).

74           Several models discuss the role of HRV in adaptive psychophysiological  
75 responding (Grossman & Taylor, 2007; Laborde et al., 2018; Porges, 2007, 2011;  
76 Smith et al., 2017; Thayer & Lane, 2000, 2009). In particular, the Neurovisceral  
77 Integration Model (NIM; Smith et al., 2017; Thayer & Lane, 2000, 2009) outlines a  
78 complex and reciprocal network of neural regions that overlap to support autonomic,  
79 cognitive and affective regulatory processes. At the heart of the NIM is the ‘central  
80 autonomic network’ (CAN; Benarroch, 1993), which encompasses higher cortical  
81 structures (ventromedial prefrontal cortex, anterior cingulate cortex), subcortical limbic  
82 regions (central nucleus of the amygdala, hypothalamus) and brainstem structures  
83 (periaqueductal gray, parabrachial nucleus), forming a vital, coordinated network that  
84 facilitates autonomic function and regulation (Benarroch, 1993; Thayer et al., 2009a).  
85 The NIM posits that the prefrontal cortex exerts tonic inhibitory control over subcortical  
86 structures, and by extension the vagus nerve. As such, resting HRV is proposed to  
87 serve as an index of the effective functioning of inhibitory cortical-subcortical  
88 connectivity and CNS-ANS integration, in turn promoting adaptive self-regulation  
89 (Thayer & Lane, 2000, 2009; Thayer et al., 2009a).

90           A growing body of neuroimaging research lends support for the NIM and the  
91 link between HRV and emotion regulation-related brain function (Mather & Thayer,  
92 2018; Sakaki et al., 2016; Schumann et al., 2021a; Steinfurth et al., 2018). Consistent  
93 with the notion that HRV serves as a measure of effective, inhibitory cortical-  
94 subcortical connectivity, individuals with higher HRV exhibit stronger resting medial  
95 prefrontal cortex (mPFC)-amygdala functional connectivity (Nashiro et al., 2022;  
96 Sakaki et al., 2016). Furthermore, compared to older adults in this sample, young  
97 adults with higher HRV were discovered to have stronger amygdala-ventrolateral  
98 prefrontal cortex (vlPFC) connectivity (Sakaki et al., 2016). Relatedly, a study

99 conducted by Kumral et al. (2019) found that young adults with higher resting HRV  
100 exhibited stronger bilateral ventromedial prefrontal cortex (vmPFC) connectivity, with  
101 this vmPFC seed demonstrating further extended functional connectivity with several  
102 CAN regions. Increasing HRV via biofeedback (e.g., slow breathing, Lehrer & Gevirtz,  
103 2014) has also been shown to elevate resting-state functional connectivity of the  
104 prefrontal cortex to neural regions implicated in emotional processing (Schumann et  
105 al., 2021a). Specifically, increasing HRV via an 8-week HRV biofeedback intervention  
106 was reported to enhance resting-state functional connectivity between the vmPFC and  
107 various regions outlined in the NIM, including the amygdala, middle cingulate cortex,  
108 anterior insula, and lateral PFC (Schumann et al., 2021a). Interestingly, only a few  
109 studies to date have assessed HRV and associated neural activity during tasks that  
110 require emotional or self-regulatory processes. One study discovered that higher  
111 resting HRV was related to increased vmPFC activation during an effortful self-control  
112 dietary task in young adults (Maier & Hare, 2017). Using a voluntary emotion  
113 regulation paradigm, Steinfurth et al. (2018) reported that young adults with higher  
114 HRV more effectively recruited the dorsal medial prefrontal cortex to modulate  
115 amygdala responses via reappraisal. In summary, many of the brain areas identified  
116 in HRV neuroimaging studies overlap with regions involved in supporting automatic  
117 and voluntary emotion regulatory processes (Morawetz et al., 2020; Wager et al.,  
118 2008).

119         Nonetheless, it is evident that previous research has largely focused on HRV  
120 and neural functional connectivity predominantly during rest (i.e., in the absence of an  
121 explicit task), with considerably fewer studies focusing on explicit emotion regulation.  
122 Resting-state paradigms have recently received criticism in the literature, especially in  
123 relation to the utility, interpretability and reliability of neural findings observed under

124 resting-state contexts (Finn, 2021). Indeed, the state of 'rest' is increasingly being  
125 recognised as a 'task' in and of itself, with many unconstrained, internal state factors  
126 contributing to diverse cognitive states (Finn, 2021). Recent evidence has highlighted  
127 the potential advantage of demands imposed by task engagement, and how such  
128 demands may constrain underlying neural functional connectivity to reduce variance  
129 related to aforementioned internal state factors, in turn increasing sensitivity to detect  
130 individual differences of interest (Finn & Bandettini, 2021). Crucially, since the NIM  
131 emphasises the role of the inhibitory cortical-subcortical circuitry in supporting  
132 adaptive self-regulation, examining HRV and associated functional connectivity in  
133 contexts that require active engagement of emotion regulatory processes may help to  
134 further our understanding of heart-brain function in supporting emotion regulation.

135         In the current study, we sought to extend on previous resting-state functional  
136 connectivity findings, examining associations between pulse-derived HRV and neural  
137 functional connectivity whilst participants actively engaged in a voluntary emotion  
138 regulation task in the scanner. On the basis of prior findings, we hypothesised that  
139 HRV would be positively associated with functional connectivity between the  
140 amygdala and a region of the mPFC previously associated with HRV (Sakaki et al.,  
141 2016). Specifically, we predicted that old and young adults with higher HRV would  
142 exhibit stronger positive amygdala-mPFC functional connectivity during a cognitive  
143 reappraisal task. Given that pulse recordings were obtained concurrently in the  
144 scanning session with the reappraisal task, our primary focus was to examine the  
145 relationship between HRV and amygdala connectivity in an emotion regulation  
146 context, adopting a functional connectivity analysis similar to that performed on  
147 resting-state data (e.g., calculating functional connectivity during the reappraisal task).  
148 However, for conceptual replication and comparative purposes, we further assessed

149 pulse-derived HRV and associated resting-state functional connectivity acquired  
150 during an initial scanning session that took place 1-2 weeks prior to the session where  
151 the HRV measures were obtained (further details and results are presented in the  
152 Supplementary Material).

153

154

## 2. Materials and Method

155

### 2.1. Participants

156

157

158

159

160

161

162

163

164

165

166

167

Participants in the current study were derived from a larger sample of 91 subjects (71 old adults, 20 young adults) previously recruited as part of an ageing research project (Lloyd et al., 2021; <https://openneuro.org/datasets/ds002620>). All participants were recruited via the University of Reading's Older Adult Research Panel and through local poster and newspaper advertisements in Reading. Participants received financial compensation (£7.50 per hour) for their participation. From the overall sample, 74 participants (55 old adults, 19 young adults) had both emotion regulation task-based functional magnetic resonance imaging (fMRI) and pulse data. Figure 1 illustrates the participant selection and exclusion process. Following exclusion, 70 participants (52 old and 18 young adults, aged 18-84 years,  $M$  age = 58.27 years,  $SD = 20.33$ ; 51% male) were considered for analyses (see Table 1 for details per age group).

168

169

170

171

172

173

All participants were right-handed and reported no history of neurological disorder. Medical history and medication details were obtained for the older adults only. Of the older adults included in the study ( $N = 52$ ), 15 disclosed taking regular medication for blood pressure and/or cardiovascular health: statins ( $N = 8$ ), angiotensin-converting enzyme inhibitors ( $N = 2$ ), angiotensin receptor blockers ( $N = 2$ ), calcium channel blockers ( $N = 2$ ) and beta-blockers ( $N = 1$ ). The remaining 37



174 participants did not report use of medication related to cardiovascular health.  
175 Furthermore, 21 participants reported having experienced a cardiovascular health  
176 condition: high blood pressure (N = 12), high cholesterol (N = 6) and mini-stroke (N =  
177 3). Given that we did not observe significant differences in HRV between those taking  
178 cardiovascular medication ( $t(50) = -0.46, p = .647, d = -0.14$ ) and those who disclosed  
179 a history of cardiovascular disease ( $t(50) = -0.70, p = .485, d = -.20$ ), with participants  
180 that did not report use of cardiovascular medication and/or a history of cardiovascular  
181 disease, we opted to retain these older adults in the analyses.

182 The research study from which the current sample was derived was carried out  
183 in accordance with the Declaration of Helsinki (1991, p.1194). The study's procedures  
184 were given a favourable ethical opinion of conduct by the University of Reading's  
185 Ethics Committee and NHS Research Ethics Service. Participants provided written  
186 informed consent prior to their participation.

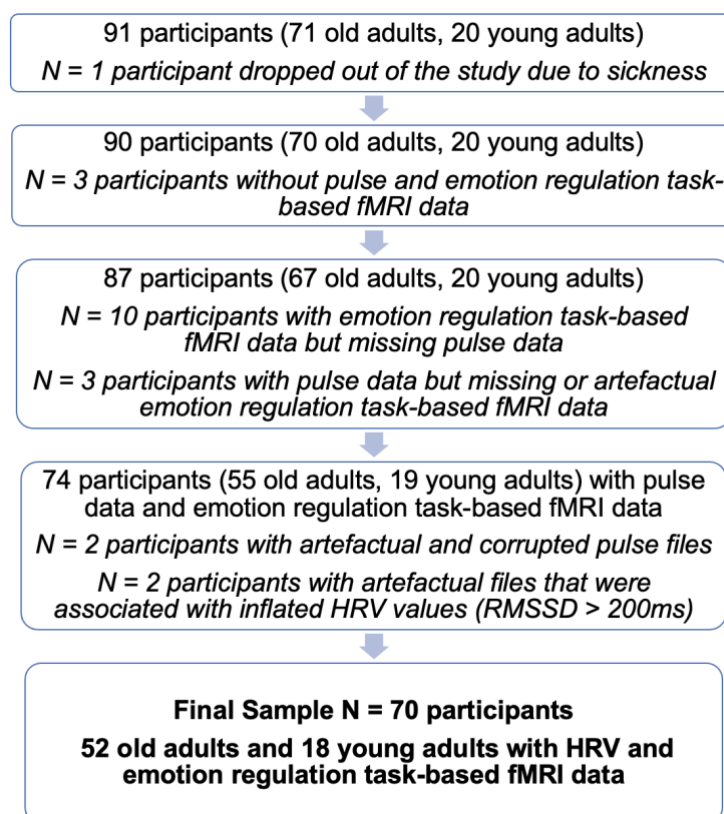

**Figure 1.** Participant selection and exclusion process. Participants were selected from a larger pool of subjects recruited as part of a wider ageing study.



## 187 **2.2. Materials and Procedure**

### 188 **2.2.1. Cognitive Reappraisal Task**

189 Participants engaged in a voluntary emotion regulation task during the scan,  
190 which followed an established cognitive reappraisal paradigm employed by previous  
191 research (e.g., van Reekum et al., 2007). A detailed description of the reappraisal task  
192 and stimuli can be found in Lloyd et al. (2021).

193 The cognitive reappraisal task comprised of 96 trials in total, in which 72  
194 negative and 24 neutral pictures obtained from the International Affective Picture  
195 System (IAPS; Lang et al., 2008) were presented. On a given trial, participants were  
196 instructed to either “suppress” (decrease), “enhance” (increase), or “maintain” their  
197 emotional response and attend to the negative image presented (neutral images were  
198 always paired with the “maintain” instruction). The “suppress” instruction involved  
199 imagining an outcome less negative than the participant’s original thoughts and/or  
200 feelings towards the image, whilst “enhance” required imagining a worse or more  
201 negative outcome than originally experienced. In the “maintain” condition, participants  
202 were instructed to simply attend to the image and sustain their emotional response.  
203 Following the presentation of the picture and engagement in the relevant auditory  
204 regulation instruction, participants were asked to rate the picture via a 4-button MR-  
205 compatible button box held in the participant’s right hand.

206 The scanning procedure was distributed across four identical runs, with 24  
207 trials in each run. The duration of each run was approximately 7 minutes, with rest  
208 breaks offered between runs, leading to an overall task duration of approximately 30  
209 minutes.

210

### 211 **2.2.2. General Procedure**

212 Participants were invited to attend two different sessions within the Centre for  
213 Integrative Neuroscience and Neurodynamics (CINN) at the University of Reading.  
214 The first session comprised an initial scanning protocol to obtain anatomical T1-  
215 weighted (T1w) structural scans, localisers and a resting-state scan, whereby  
216 participants were instructed to maintain their gaze on a fixation cross presented in the  
217 middle of the screen (rsfMRI scan duration of 10 minutes, 11 seconds). Participants  
218 also engaged in several cognitive tasks outside of the scanner which are summarised  
219 elsewhere (Lloyd et al., 2021). The first session had an overall duration of  
220 approximately three hours (1 hour scanning time). Participants were invited back for a  
221 second session which took place a few days (two weeks maximum) after the first  
222 session. In the second session, further anatomical (T1w) scans were acquired and  
223 participants performed two tasks whilst in the scanner: the cognitive reappraisal  
224 (emotion regulation) task and an emotional faces processing task. The participant's  
225 pulse was recorded throughout the scan. The overall duration of the second session  
226 was approximately two hours (1 hour scanning time).

227

## 228 **2.3. Data Reduction and Analysis**

### 229 **2.3.1. HRV Processing and Analysis**

230 A pulse signal was continuously recorded via an MRI-compatible pulse  
231 oximeter clip attached to the participant's left finger throughout the scanning session,  
232 including breaks (sampling rate = 50 Hz). The pulse oximeter was integrated with the  
233 Siemens Magnetom Trio MRI scanner, from which the raw pulse signal was  
234 subsequently extracted.

235 The raw pulse files underwent visual inspection for quality and usability prior to  
236 pre-processing and were formatted to read into LabChart software (version 8.1.11; AD

237 Instruments, Oxford, UK). Initial manual edits within LabChart involved cutting the  
238 beginning and/or end of the file where flatlines and/or obvious calibration and motion-  
239 related noise were visually detected. Subsequently, LabChart files were converted and  
240 exported into LabChart text files to ensure compatibility with Kubios HRV Analysis  
241 software (version 2.2; Biosignal Analysis and Medical Imaging Group, University of  
242 Kuopio, Finland; Tarvainen et al., 2014). Further processing of the pulse signal and  
243 calculation of HRV measures were performed within Kubios. Taking into consideration  
244 variation in breaks between runs and tasks, alongside the quality of the pulse signal,  
245 participants had somewhat varying durations of pulse signal for analysis (range 17-76  
246 minutes,  $M$  duration = 51 minutes). Occasionally, the automated peak detection  
247 feature either misplaced or missed the peak, thus resulting in manual corrections to  
248 either place or (re)move markers to the peak of the pulse waveform. Following manual  
249 corrections, data were artefact-corrected using the “low” threshold setting (350 ms)  
250 across all participants to retain as many natural variations between heart beats as  
251 possible.

252 The Root Mean Square of Successive Differences (RMSSD), measured in  
253 milliseconds, and High-Frequency HRV (HF-HRV), defined using a frequency band of  
254 0.15 – 0.40 Hz, measured in absolute power ( $\text{ms}^2$ , Fast Fourier Transform) were  
255 calculated within Kubios. Both measures were natural log transformed ( $\ln$ ) to correct  
256 for positive skew within RStudio (version 1.4.1106) using the ‘log’ command from the  
257 base package (v3.5.2). Despite variation in pulse duration, this did not demonstrate a  
258 significant correlation with either raw RMSSD ( $r = -.04$ ,  $p = .747$ ) or natural log  
259 transformed RMSSD ( $r = .02$ ,  $p = .840$ ) values across participants ( $N = 70$ ). Whilst  
260 RMSSD and HF-HRV metrics reflect parasympathetic vagal control, the RMSSD is a  
261 primary and robust measure of vagal tone (Kleiger et al., 2005), that is generally less

262 susceptible to physiological noise, including respiratory influence (Hill et al., 2009).  
263 Also, given that both natural log transformed HRV measures exhibited a strong  
264 positive association in the current study ( $r = .98, p < .001$ ), we proceeded with the  
265 (ln)RMSSD as our primary HRV metric for all analyses.

266

### 267 **2.3.2. MRI Image Acquisition**

268 Structural and blood oxygenation level dependent (BOLD) functional imaging  
269 data were acquired using a 3T Siemens Magnetom Trio MRI scanner with a 12-  
270 channel head coil (Siemens, Healthcare, Erlangen, Germany) contained within the  
271 CINN at the University of Reading. For each participant, a 3D structural MRI was  
272 obtained via a T1-weighted sequence (Magnetization Prepared Rapid Acquisition  
273 Gradient Echo (MPRAGE)), repetition time (TR) = 2020 ms, echo time (TE) = 3.02 ms,  
274 inversion time (TI) = 900 ms, flip angle 9°, field of view (FOV) = 250 x 250 x 192 mm,  
275 resolution = 1 mm isotropic, acceleration factor = 2, averages = 2, acquisition time =  
276 9 minutes, 7 seconds). The emotion regulation fMRI data were obtained in four blocks  
277 of identical procedure, using an echo planar imaging (EPI) sequence (211 whole-brain  
278 volumes, 30 sagittal slices with P>A phase encoding, slice thickness = 3.0 mm, slice  
279 gap = 33%, TR = 2000 ms, TE = 30 ms, flip angle = 90°, FOV = 192 x 192 mm<sup>2</sup>,  
280 resolution = 3 mm isotropic, acquisition time = 7 minutes 10 seconds per block). The  
281 structural and emotion regulation fMRI task data are publicly available on OpenNeuro:  
282 <https://openneuro.org/datasets/ds002620/versions/1.0.0>.

283

### 284 **2.3.3. MRI Data Pre-processing**

285 Functional imaging data were pre-processed and analysed using FMRIB's  
286 Software Library (FSL, version 6.0; [www.fmrib.ox.ac.uk/fsl](http://www.fmrib.ox.ac.uk/fsl); Jenkinson et al., 2012;

287 Woolrich et al., 2009; Smith et al., 2004) and Analysis of Functional NeuroImages  
288 (AFNI, version 19.3.03; <http://afni.nimh.nih.gov/afni>; Cox, 1996). Initial pre-processing  
289 steps included: skull stripping (non-brain removal) using FSL's brain extraction tool  
290 (BET; Smith, 2002), motion correction using MCFLIRT (Jenkinson et al., 2002), field-  
291 map correction to correct for potential magnetic field inhomogeneity distortions, spatial  
292 smoothing using a Gaussian kernel with a full-width half maximum (FWHM) of 5 mm  
293 and high-pass temporal filtering (Gaussian-weighted least squares straight line fitting  
294 with  $\sigma = 50$  s). Each subject's native image was normalised to Montreal  
295 Neurological Institute (MNI) space via co-registration to their high resolution T1-  
296 weighted image.

297 Application of FSL's MELODIC Independent Components Analysis (ICA;  
298 Beckmann & Smith, 2004) separated the fMRI BOLD signal into a set of spatial maps  
299 (independent components) representing neural signal and/or noise. Independent  
300 components containing structured temporal noise, including scanner and hardware  
301 artefacts, physiological artefacts (respiratory and/or cardiac noise), and motion-related  
302 noise were identified via visual inspection and removed using the FSL command line  
303 tool '*fslregfilt*' for each emotion regulation task run (Griffanti et al., 2017). An average  
304 percentage of 72.07% components were removed across the four runs. This is  
305 generally in line with previous research that has typically identified >70% noise versus  
306 signal components in standard sequences at 3T (Griffanti et al., 2017).

307 Following ICA filtering, low bandpass filtering was applied to the fMRI data  
308 using AFNI's '*3dBandpass*' tool (Cox, 1996) to further remove confounding signals  
309 below 0.009 Hz and above 0.1 Hz. Prior to analysis, each subject's corresponding  
310 mean functional timeseries image was added back to the bandpass filtered data using  
311 *fslmaths* to ensure compatibility with FSL's FMRI Expert Analysis Tool (FEAT).

#### 312 **2.3.4. Functional Connectivity Analysis**

313 Regions of interest (ROIs) were separate right and left amygdala seeds, and  
314 an area of the mPFC previously found to be correlated with HRV (Sakaki et al., 2016).  
315 Separate amygdala ROIs were selected given recent discrepancies in amygdala  
316 lateralisation with the mPFC as a function of HRV (Nashiro et al., 2022; Sakaki et al.,  
317 2016), and also observed lateralisation effects highlighted in previous research  
318 concerning emotion processing and regulation (Baas et al., 2004; Yang et al., 2020).  
319 Amygdala ROI masks were defined using the Harvard-Oxford Subcortical Probability  
320 atlas and thresholded at 80% probability. The mPFC ROI employed by Sakaki et al.  
321 (2016) and in the present study was derived from a significant cluster previously  
322 correlated with memory positivity (Sakaki et al., 2013), containing voxels from anterior  
323 cingulate cortex (ACC) and paracingulate gyrus (Harvard-Oxford atlas), thresholded  
324 at 25% probability.

325 All ROI masks (right and left amygdala, mPFC) were first transformed to each  
326 participant's native functional space using FSL's Apply FLIRT Transform '*ApplyXFM*'  
327 and binarised. Subsequently, the mean time series for each ROI was extracted from  
328 the four separate emotion regulation runs for each participant using '*fslmeans*'.

329 Separate first-level regression analyses were performed for each ROI using  
330 FEAT (Woolrich et al., 2001). Similar to a functional connectivity analysis typically  
331 performed on resting-state data, individual FEAT models included the mean time  
332 series extracted from the specific ROI and regressors of no interest, specifically: FSL's  
333 six standard head-motion parameters, and average white matter and ventricular (CSF)  
334 signal. Average signal from white matter and CSF was extracted from masks  
335 generated via segmentation of each participant's high resolution T1w image using  
336 FSL's FAST algorithm (Zhang et al., 2001).

337 Inclusion of global signal regression (GSR) has received scrutiny in the  
338 literature (Murphy et al., 2009; Murphy & Fox, 2017; Uddin, 2017). Given the  
339 controversy and lack of consensus surrounding GSR, we decided not to include GSR  
340 as a regressor in the model. Importantly, we did not include the task design as a  
341 regressor in our model either. It is recognised that not including the task design as a  
342 regressor in task-based functional connectivity analyses can result in spurious  
343 correlations and systematic inflation of functional connectivity estimates due to task-  
344 induced coactivations (Cole et al., 2019). However, the overarching aim of the present  
345 study is to examine HRV and associated neural functional connectivity in a voluntary  
346 emotion regulation context. Since HRV is closely related to, and considered a metric  
347 of, regulatory processes, including the task design as a regressor would remove  
348 variance of interest and relevance to the aim of our study. Furthermore, not regressing  
349 the task design has been reported to increase the reliability of functional connectivity  
350 measures (Cho et al., 2021), whilst other studies have found that inclusion versus non-  
351 inclusion of the task design in task-based connectivity analyses does not appear to  
352 significantly change the overall pattern of the functional connectivity findings reported  
353 (Cao et al., 2018; Finn, 2021; Kraus et al., 2021).

354 Prior to group-level analyses, a second-level fixed effects analysis using FSL's  
355 FEAT was applied to the emotion regulation task-based fMRI data to collapse the ROI  
356 connectivity maps across the four task runs<sup>1</sup>. This generated positive and negative  
357 mean contrast of parameter estimates (COPE) images for input to higher-level  
358 analyses.

359

---

<sup>1</sup> Two participants were missing the final run of the emotion regulation task (run 4), so ROI connectivity maps were averaged across the three available task runs (runs 1-3) for these participants.



### 360 **2.3.5. Amygdala-mPFC Functional Connectivity Analyses**

361 Beta values from right and left amygdala (positive COPE) connectivity maps  
362 were extracted using FSL's Featquery, with the mPFC seed as the reference mask.  
363 The corresponding mean parameter estimates served as an index of amygdala-mPFC  
364 connectivity strength.

365

### 366 **2.3.6. Whole-Brain Functional Connectivity Analyses**

367 Given the heterogeneous neurological profiles often observed in ageing brains  
368 (Chen et al., 2016), and the larger sample of older adults recruited in the current study,  
369 we performed whole-brain functional connectivity analyses for all ROIs across the  
370 whole sample, including age as a blocking factor in the analyses, and further  
371 performed separate whole-brain analyses restricted to the older adult sample only.  
372 This allowed us to be more inclusive in our search for functionally-relevant regions  
373 associated with HRV that may have been excluded or otherwise missed using a ROI  
374 approach. Furthermore, the decision to run separate whole-brain connectivity  
375 analyses restricted to the old adult sample was primarily driven by the unequal number  
376 of old relative to young adults (and the comparative small sample size of the young  
377 adult group), along with the strong effect of biological age on HRV (Agelink et al., 2001;  
378 Russoniello et al., 2013).

379 Whole-brain group analyses were performed using FSL's FEAT (Woolrich et  
380 al., 2004). Separate FMRIB's Local Analysis of Mixed Effects (FLAME) whole-brain  
381 analyses were carried out for each seed region. The general linear model (GLM)  
382 included four explanatory variables: group mean and three predictors, HRV  
383 (lnRMSSD, centred), age (effect coded using +1 and -1 to define old and young adult  
384 groups respectively) and a HRV by age interaction term (lnRMSSD centred x age

385 group). Seven contrasts were entered into the model: group mean, HRV, age and the  
386 HRV by age interaction term (positive and negative contrasts for each EV). Clusters  
387 surviving a threshold of  $Z > 3.1$  and correction for multiple comparisons with Gaussian  
388 random field theory (cluster significance:  $p = 0.05$ -corrected) were identified (Worsley,  
389 2001). The locations of significant clusters that survived correction were labelled using  
390 the Harvard Oxford Cortical Structural and Subcortical atlases in MNI space within  
391 FSL. Mean parameter estimate (beta) values from significant clusters that emerged  
392 as a main effect of HRV were extracted for visualisation purposes.

393

394

### 3. Results

395

#### 3.1. Descriptive Statistics

396

397

398

399

400

401

402

403

404

405

406

407

408

Table 1 summarises general descriptives for the whole sample and for old and young adult age groups separately. HRV significantly differed by age group, such that older adults demonstrated significantly reduced HRV as indexed by lower (ln)RMSSD values ( $M = 3.92$ ,  $SD = 0.55$ ), in comparison to young adults ( $M = 4.29$ ,  $SD = 0.44$ ),  $F(1,66) = 6.06$ ,  $p = .016$ ,  $\eta_p^2 = 0.08$ . However, there was no significant difference in (ln)RMSSD values between females ( $M = 4.07$ ,  $SD = 0.52$ ) and males ( $M = 3.96$ ,  $SD = 0.57$ ) across the whole sample,  $F(1,66) = 0.09$ ,  $p = .764$ ,  $\eta_p^2 = 0.00$ , nor was there a significant interaction between age group and sex on (ln)RMSSD values,  $F(1,66) = 0.15$ ,  $p = .698$ ,  $\eta_p^2 = 0.00$ . Thus, no significant differences in HRV related to sex were observed in the present study (see Figure S1 in the Supplementary Material). Additionally, there was a significant difference in the mean RR interval ( $t(68) = 2.06$ ,  $p = .044$ ,  $d = 0.56$ ), but no significant difference in mean heart rate ( $t(18) = -1.64$ ,  $p = .117$ ,  $d = -0.68$ ) between old and young adults.

**Table 1**  
 Descriptive Statistics for Age, Sex, HRV-Related Metrics and Amygdala-mPFC Connectivity Across the Whole Sample and for Old and Young Adult Sub-Samples

|                                                          | Whole Sample (N = 70)<br>M (SD) | Old Adults (N = 52)<br>M (SD) | Young Adults (N = 18)<br>M (SD) |
|----------------------------------------------------------|---------------------------------|-------------------------------|---------------------------------|
| Age                                                      | 58.27 (20.33)                   | 69.34 (8.08)                  | 26.28 (4.75)                    |
| Age Range                                                | 18 – 84 years                   | 55 – 84 years                 | 18 – 35 years                   |
| Sex (%)                                                  | 49% female, 51% male            | 44% female, 56% male          | 61% female, 39% male            |
| InRMSSD (ms)                                             | 4.01 (0.54)                     | 3.92 (0.55)                   | 4.29 (0.44)                     |
| Heart Rate (BPM)                                         | 67.60 (17.64)                   | 64.61 (9.78)                  | 76.24 (29.48)                   |
| RR Interval (ms)                                         | 937.73 (156.19)                 | 959.80 (141.43)               | 873.97 (182.24)                 |
| Right amygdala-mPFC<br>Connectivity (Parameter estimate) | 0.03 (0.13)                     | 0.02 (0.11)                   | 0.05 (0.16)                     |
| Left amygdala-mPFC Connectivity<br>(Parameter estimate)  | 0.03 (0.11)                     | 0.02 (0.10)                   | 0.05 (0.11)                     |

409 **3.2. HRV and Amygdala-mPFC Functional Connectivity Analysis**

410 Multiple regression analyses were employed to examine associations between  
 411 HRV and amygdala-mPFC functional connectivity strength in the whole sample.  
 412 Separate multiple regression models were tested with (i) right amygdala-mPFC  
 413 connectivity and (ii) left amygdala-mPFC connectivity values as dependent variables.  
 414 A segregation in age (years) was observed between the old and young adults, leading  
 415 to a natural formation of two separate age groups (see Figure S2 in the Supplementary  
 416 Material). We therefore entered age as a categorical predictor in the regression  
 417 models. The following predictors were entered into the regression model: age group  
 418 (1 = old adults, 0 = young adults), (ln)RMSSD (centered), and a HRV x age interaction

419 term<sup>2</sup>. In each model, age group and HRV were entered first (step 1), followed by the  
420 HRV x age interaction predictor (step 2). Standardised beta coefficients are reported  
421 for all predictors.

422

### 423 *3.2.1. HRV and Right Amygdala-mPFC Functional Connectivity*

424 Neither age ( $\beta = -0.12$ ,  $t = -0.94$ ,  $p = .350$ ) or HRV ( $\beta = -0.02$ ,  $t = 0.14$ ,  $p = .886$ )  
425 contributed significantly to the overall regression model,  $F(2,67) = 0.45$ ,  $p = .637$ ,  
426 explaining only 1.3% of the variance in right amygdala-mPFC functional connectivity.  
427 Entering the HRV x age interaction term into the model improved the proportion of  
428 variance explained in right amygdala-mPFC connectivity ( $\Delta R^2 = 0.13$ ,  $F(3,66) = 3.62$ ,  
429  $p = .018$ ). The interaction between HRV and age was found to significantly predict  
430 right amygdala-mPFC functional connectivity strength ( $\beta = 0.86$ ,  $t = 3.14$ ,  $p = .003$ ).  
431 Follow-up regression models indicated that the younger adults appeared to drive this  
432 interaction, such that young adults with higher HRV exhibited significantly weaker right  
433 amygdala-mPFC functional connectivity ( $\beta = -0.54$ ,  $t = -2.54$ ,  $p = .022$ ), whereas old  
434 adults demonstrated a slight positive, albeit non-significant, association between HRV  
435 and right amygdala-mPFC connectivity during the task ( $\beta = 0.17$ ,  $t = 1.24$ ,  $p = .222$ )  
436 (Figure 2a).

437

### 438 *3.2.2. HRV and Left Amygdala-mPFC Functional Connectivity*

439 Similar to the right amygdala-mPFC functional connectivity findings, HRV ( $\beta =$   
440  $-0.03$ ,  $t = -0.26$ ,  $p = .797$ ) and age ( $\beta = -0.09$ ,  $t = -0.73$ ,  $p = .466$ ) did not contribute  
441 significantly to the overall model,  $F(2,67) = 0.27$ ,  $p = .764$ , and explained very minimal

---

<sup>2</sup> To reduce the influence of multicollinearity that can occur between the original variables and the subsequent interaction that is comprised of those variables, the HRV x age interaction term was calculated by multiplying the centered (ln)RMSSD scores by the dummy coded age group.

442 variance (0.8%) in left amygdala-mPFC functional connectivity strength. However,  
443 when the HRV x age interaction term was entered into the model, this improved the  
444 proportion of variance explained in left amygdala-mPFC connectivity ( $\Delta R^2 = 0.08$ ),  
445 although the overall model remained non-significant,  $F(3,66) = 2.07$ ,  $p = .112$ . The  
446 HRV x age interaction was found to predict left amygdala-mPFC connectivity strength  
447 ( $\beta = 0.67$ ,  $t = 2.38$ ,  $p = .020$ ). Follow-up regression models per age group revealed  
448 younger adults to drive this significant interaction, whereby greater HRV significantly  
449 predicted weaker left amygdala-mPFC functional connectivity in young adults ( $\beta =$   
450  $0.51$ ,  $t = -2.37$ ,  $p = .031$ ). Conversely, a non-significant, weak positive association  
451 between HRV and left amygdala-mPFC connectivity strength was observed in old  
452 adults ( $\beta = 0.10$ ,  $t = 0.74$ ,  $p = .461$ ) (Figure 2b).

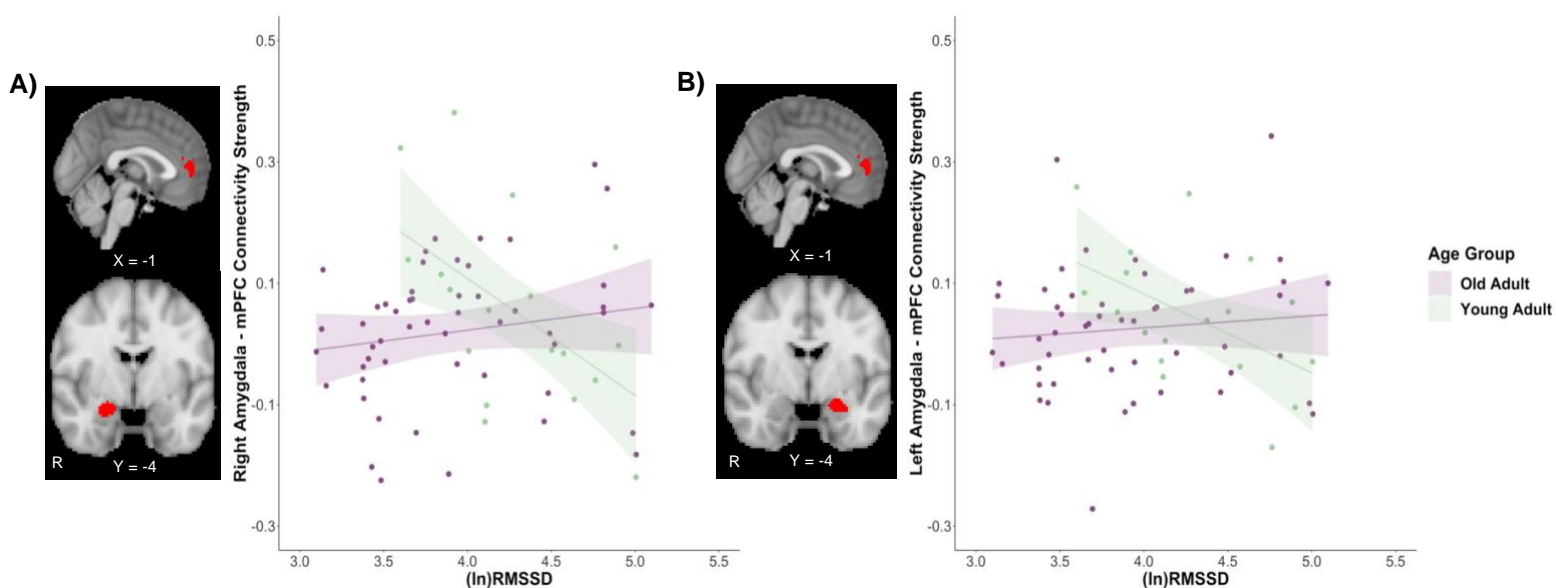

**Figure 2.** HRV and amygdala-mPFC functional connectivity during the reappraisal task. **A)** mPFC seed (top) and right amygdala seed (bottom). Significant HRV x age interaction for right amygdala-mPFC connectivity strength. In young adults (light green), higher HRV significantly predicted weaker connectivity between the right amygdala and mPFC, whereas a slight positive, albeit non-significant, association between HRV and right amygdala-mPFC connectivity was observed in the old adults (purple). **B)** mPFC seed (top) and left amygdala seed (bottom). Significant HRV x age interaction for left amygdala-mPFC connectivity strength. Similar to the right amygdala connectivity findings, in young adults, greater HRV significantly predicted weaker left amygdala-mPFC connectivity, whereas a non-significant, weak positive association between HRV and left amygdala-mPFC connectivity was observed in the old adults during the reappraisal task. *(ln)RMSSD*; natural log transformed root mean square of successive differences.

### 453 3.3. Whole-Brain Functional Connectivity Analyses

#### 454 3.3.1. Right Amygdala Whole-Brain Functional Connectivity

455 Significant clusters surviving correction as a main effect of HRV for the right  
456 amygdala whole-brain functional connectivity analyses are displayed in Table 2.  
457 Across old and young adults, higher HRV was associated with weaker right amygdala  
458 connectivity between the right angular gyrus (extending into right superior lateral  
459 occipital cortex), and bilateral posterior cingulate gyrus ( $Z > 3.1$ ,  $p = 0.05$ -corrected).  
460 A scatterplot displaying beta values extracted from the bilateral posterior cingulate  
461 gyrus cluster with HRV are displayed in Figure 3. No other clusters survived correction  
462 for the positive HRV contrast, nor for positive or negative HRV by age interaction  
463 contrasts across the whole sample.

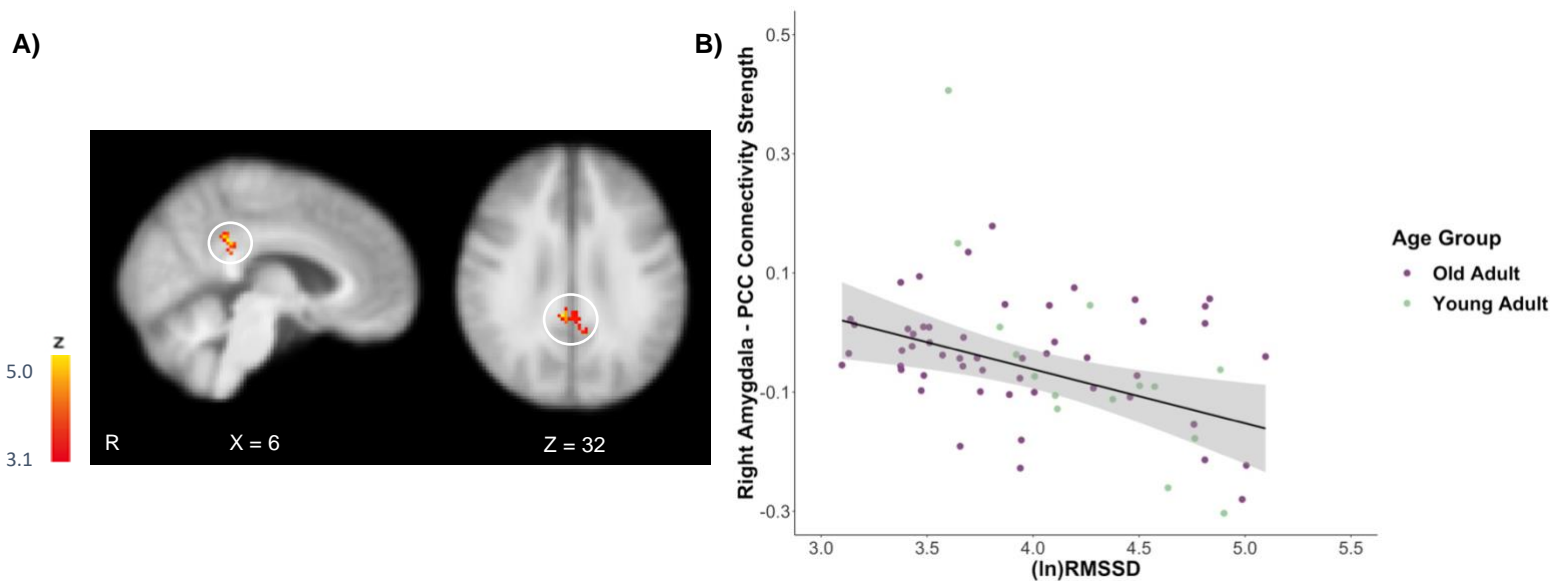

**Figure 3. A)** Significant bilateral posterior cingulate cortex (PCC) cluster that survived correction as a main effect for the negative HRV contrast in the right amygdala whole-brain analysis ( $Z > 3.1$ ,  $p = 0.05$ -corrected). **B)** Scatterplot displays the inverse association between HRV ((ln)RMSSD) values and standardised beta values depicting right amygdala-bilateral PCC connectivity strength in the whole sample during the reappraisal task in old and young adults ( $N = 70$ ). Note that the different colours assigned to old (purple) versus young (light green) adult age groups are depicted for display purposes only. (ln)RMSSD; natural log transformed root mean square of successive differences.

464 Repeating this analysis on the old adult sample only, a significant main effect  
465 of HRV emerged, such that higher HRV was positively correlated with stronger  
466 functional connectivity between the right amygdala and the right inferior frontal gyrus,  
467 a cluster forming part of the right ventrolateral prefrontal cortex (vIPFC). A scatterplot  
468 displaying beta values extracted from this right vIPFC cluster with HRV are displayed  
469 in Figure 4. Moreover, for the HRV negative contrast, higher HRV was associated with  
470 weaker right amygdala connectivity with several regions, including bilateral superior  
471 lateral occipital cortex extending into left angular and supramarginal gyrus, and  
472 bilateral precuneus.

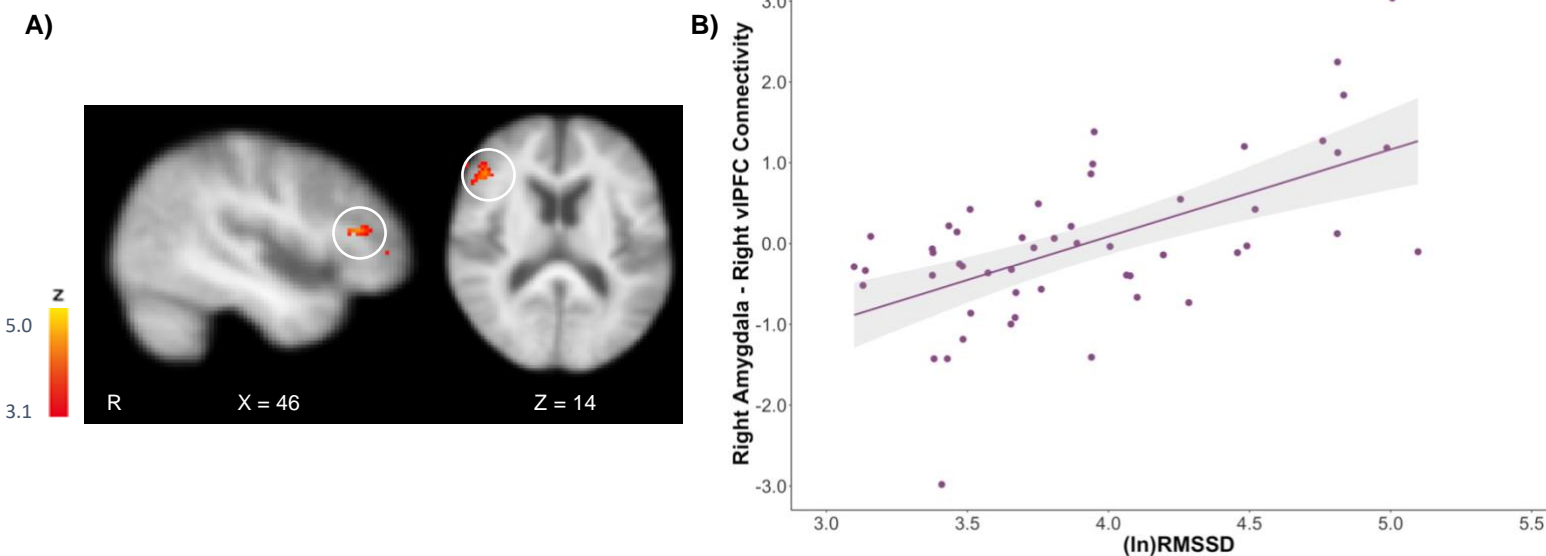

**Figure 4.** **A)** Significant right inferior frontal gyrus (vIPFC) cluster that survived correction as a main effect for the positive HRV contrast in the right amygdala whole-brain analysis restricted to the old adult sample ( $Z > 3.1$ ,  $p = 0.05$ -corrected). **B)** Scatterplot displays the positive association between HRV ((ln)RMSSD) values and standardised beta values depicting right amygdala – right vIPFC connectivity strength in the old adult sample (controlling for age). (ln)RMSSD; natural log transformed root mean square of successive differences.



**Table 2**

Neural Regions and Local Maxima for Right Amygdala Whole-Brain Connectivity

| Region                                                         | H   | Cluster Size | BA        | MNI Coordinates |            |           | Z           |
|----------------------------------------------------------------|-----|--------------|-----------|-----------------|------------|-----------|-------------|
|                                                                |     |              |           | x               | y          | z         |             |
| <i>HRV + (old and young adults)</i>                            |     |              |           |                 |            |           |             |
| <b>No significant results</b>                                  |     |              |           |                 |            |           |             |
| <i>HRV - (old and young adults)</i>                            |     |              |           |                 |            |           |             |
| Angular Gyrus extending into Superior Lateral Occipital Cortex | R   | <b>103</b>   | <b>39</b> | <b>40</b>       | <b>-58</b> | <b>16</b> | <b>5.89</b> |
|                                                                | R   |              |           | 56              | -66        | 24        | 3.30        |
| Posterior Cingulate Gyrus                                      | R   | <b>87</b>    | <b>23</b> | <b>6</b>        | <b>-40</b> | <b>32</b> | <b>5.12</b> |
|                                                                | R   |              |           | 2               | -42        | 34        | 4.59        |
|                                                                | L   |              |           | 0               | -38        | 26        | 4.29        |
|                                                                | R/L |              |           | 0               | -40        | 30        | 4.06        |
|                                                                | L   |              |           | -4              | -48        | 34        | 3.59        |
| <i>HRV x Age Interaction + (old and young adults)</i>          |     |              |           |                 |            |           |             |
| <b>No significant results</b>                                  |     |              |           |                 |            |           |             |
| <i>HRV x Age Interaction – (old and young adults)</i>          |     |              |           |                 |            |           |             |
| <b>No significant results</b>                                  |     |              |           |                 |            |           |             |
| <i>HRV + (old adults)</i>                                      |     |              |           |                 |            |           |             |
| Inferior Frontal Gyrus                                         | R   | <b>111</b>   | <b>46</b> | <b>46</b>       | <b>32</b>  | <b>14</b> | <b>4.16</b> |
|                                                                | R   |              |           | 52              | 34         | 10        | 3.82        |
| Frontal Pole                                                   | R   |              |           | 48              | 44         | 2         | 3.76        |
|                                                                | R   |              |           | 58              | 38         | 12        | 3.76        |
| Inferior Frontal Gyrus                                         | R   |              | 45        | 54              | 24         | 12        | 3.49        |
|                                                                | R   |              | 44        | 52              | 20         | 12        | 3.25        |
| <i>HRV - (old adults)</i>                                      |     |              |           |                 |            |           |             |

|                                                                   |     |            |           |            |            |           |             |
|-------------------------------------------------------------------|-----|------------|-----------|------------|------------|-----------|-------------|
| Superior Lateral Occipital Cortex<br>extending into Angular Gyrus | L   | <b>359</b> | <b>39</b> | <b>-38</b> | <b>-62</b> | <b>46</b> | <b>4.86</b> |
|                                                                   | L   |            |           | -36        | -76        | 36        | 4.43        |
|                                                                   | L   |            |           | -36        | -70        | 34        | 4.35        |
| Supramarginal Gyrus                                               | L   |            |           | -50        | -46        | 46        | 4.33        |
| Angular Gyrus extending into<br>Supramarginal Gyrus               | L   |            |           | -44        | -48        | 38        | 4.26        |
|                                                                   | L   |            |           | -44        | -54        | 44        | 4.24        |
| Precuneus                                                         | R/L | <b>159</b> | <b>7</b>  | <b>2</b>   | <b>-74</b> | <b>60</b> | <b>5.41</b> |
|                                                                   | R/L |            |           | 0          | -64        | 48        | 3.90        |
| Superior Lateral Occipital Cortex                                 | R   |            |           | 10         | -78        | 54        | 3.33        |

---

Neural regions that demonstrated associations with right amygdala as a function of HRV ( $Z = 3.1$ ; cluster significance:  $p < 0.05$ , corrected). Local maxima are listed for clusters containing more than one peak. Cluster size refers to the number of voxels contained within a specific cluster. Coordinates (MNI space) represent location of clusters and their maximum Z-scores (bold) and the location of local maxima within significant clusters and their associated Z-statistic. The Harvard Oxford Structural Cortical and Subcortical atlases within FSL were used to label significant clusters. BA refers to the Brodmann Area for each cluster. The 'R' package *label4MRI* (v1.2) was used to generate the BA label based on the MNI coordinates. H = hemisphere (L = left, R = right).

### 473 3.3.2. Left Amygdala Whole-Brain Functional Connectivity

474 No significant clusters survived correction as a function of HRV for left  
 475 amygdala functional connectivity in the whole sample ( $Z > 3.1$ ,  $p = 0.05$ -corrected),  
 476 suggesting that HRV did not covary with left amygdala whole-brain functional  
 477 connectivity across old and young adults throughout the reappraisal task.

478 When the left amygdala voxelwise whole-brain search was restricted to the old  
 479 adult sample, a significant positive main effect of HRV was observed, in which higher  
 480 HRV was correlated with stronger left amygdala connectivity with the right inferior  
 481 frontal gyrus (vIPFC) and more extensively with the right precentral gyrus ( $Z > 3.1$ ,  $p$   
 482 = 0.05-corrected). Furthermore, significant clusters also survived correction for the

483 negative HRV contrast, such that higher HRV correlated with reduced left amygdala –  
484 left lateral occipital cortex connectivity. Other brain regions that survived correction as  
485 a main effect of HRV for the left amygdala whole-brain functional connectivity analyses  
486 in the old adults are displayed in Table 3.

487

### 488 *3.3.3. MPFC Whole-Brain Functional Connectivity*

489 No clusters survived correction as a main effect of HRV for the mPFC seed in  
490 a voxelwise whole-brain search in the whole sample, nor when the analysis was  
491 restricted to the old adult sample ( $Z > 3.1$ ,  $p = 0.05$ -corrected). Therefore, HRV did not  
492 significantly predict functional connectivity of this particular area of the mPFC during  
493 the reappraisal task.

**Table 3**

Neural Regions and Local Maxima for Left Amygdala Whole-Brain Connectivity

| Region                                                | H | Cluster Size | BA        | MNI Coordinates |            |           | Z           |
|-------------------------------------------------------|---|--------------|-----------|-----------------|------------|-----------|-------------|
|                                                       |   |              |           | x               | y          | z         |             |
| <i>HRV + (old and young adults)</i>                   |   |              |           |                 |            |           |             |
| <b>No significant results</b>                         |   |              |           |                 |            |           |             |
| <i>HRV - (old and young adults)</i>                   |   |              |           |                 |            |           |             |
| <b>No significant results</b>                         |   |              |           |                 |            |           |             |
| <i>HRV x Age Interaction + (old and young adults)</i> |   |              |           |                 |            |           |             |
| <b>No significant results</b>                         |   |              |           |                 |            |           |             |
| <i>HRV x Age Interaction – (old and young adults)</i> |   |              |           |                 |            |           |             |
| <b>No significant results</b>                         |   |              |           |                 |            |           |             |
| <i>HRV + (old adults)</i>                             |   |              |           |                 |            |           |             |
| Inferior Frontal Gyrus                                | R | <b>78</b>    | <b>44</b> | <b>48</b>       | <b>12</b>  | <b>30</b> | <b>4.10</b> |
| Precentral Gyrus                                      | R |              | 46        | 38              | 0          | 32        | 3.99        |
| Precentral Gyrus extending into Middle Frontal Gyrus  | R |              | 8         | 44              | 8          | 34        | 3.71        |
| Precentral Gyrus                                      | R |              | 6         | 46              | 4          | 28        | 3.65        |
|                                                       | R |              |           | 48              | 6          | 32        | 3.39        |
|                                                       | R |              | 8         | 32              | 0          | 34        | 3.28        |
| <i>HRV - (old adults)</i>                             |   |              |           |                 |            |           |             |
| Superior Lateral Occipital Cortex                     | L | <b>156</b>   | <b>39</b> | <b>-42</b>      | <b>-68</b> | <b>44</b> | <b>4.25</b> |
|                                                       | L |              |           | -48             | -78        | 36        | 4.14        |
|                                                       | L |              |           | -38             | -68        | 40        | 3.87        |
|                                                       | L |              |           | -40             | -70        | 36        | 3.83        |
| Angular Gyrus                                         | L |              |           | -44             | -56        | 46        | 3.66        |



512 stronger functional coupling between the amygdala and mPFC in an active regulatory  
513 context. In old adults, we observed a slight positive, but non-significant, association  
514 between HRV and amygdala-mPFC connectivity, partially supporting our hypothesis.  
515 Conversely, young adults displayed a stronger, inverse association, whereby higher  
516 HRV was linked to reduced functional connectivity between the amygdala and mPFC.  
517 Furthermore, in a voxelwise whole-brain search, we discovered that old and young  
518 adults with higher HRV exhibited weaker right amygdala-PCC connectivity.  
519 Interestingly, in old adults, higher HRV was associated with stronger coupling between  
520 the right amygdala and right vIPFC. Our findings indicate that HRV covaries with  
521 amygdala functional connectivity during emotion regulation, and more crucially  
522 highlight the importance of assessing HRV and brain function during an active emotion  
523 regulatory context.

524 Functional connectivity between the amygdala and mPFC is proposed to  
525 support adaptive emotion regulation, with HRV posited to serve as a peripheral index  
526 of prefrontal inhibitory control (Thayer & Lane, 2000, 2009; Thayer et al., 2009a). In  
527 line with this proposition, prior studies have reported positive associations between  
528 HRV and amygdala-mPFC connectivity strength irrespective of age (Nashiro et al.,  
529 2022; Sakaki et al., 2016). However, within the context of the emotion regulation task,  
530 we found significant interactions between age and HRV to predict both right and left  
531 amygdala coupling with the mPFC. The direction of the effect was unexpected, with  
532 the young adults driving the interaction, but in whom higher HRV was linked to weaker,  
533 rather than a strong positive, coupling between the amygdala and mPFC. It is possible  
534 that this particular region of the mPFC is more heavily recruited during rest, compared  
535 to an active emotion regulation context. Indeed, during rest, we found a sub-threshold  
536 cluster within the mPFC close to our ROI that demonstrated increased functional

537 connectivity with the left amygdala as a function of higher HRV across old and young  
538 adults (see Figure S3 in the Supplementary Material). Recently, Nashiro et al. (2022)  
539 also found that increases in HRV via biofeedback were correlated with stronger left,  
540 but not right, amygdala coupling with the mPFC at rest. Furthermore, prior work has  
541 found inverse amygdala-mPFC coupling when using reappraisal to decrease negative  
542 affect in a student-aged population (Lee et al., 2012). Hence, the inverse association  
543 reported here in young adults may be driven by the decrease conditions throughout  
544 the task, although at this stage these findings would require replication using a more  
545 targeted event-related connectivity analysis, which is beyond the scope of this  
546 manuscript. Taken together, our findings potentially suggest that the regulatory  
547 context can affect both the laterality and directionality of amygdala-mPFC functional  
548 connectivity associations with HRV.

549 Furthermore, higher HRV was significantly associated with weaker right  
550 amygdala connectivity between the right angular gyrus and bilateral PCC across the  
551 emotion regulation task in old and young adults. Both the angular gyrus and PCC form  
552 major nodes of the default mode network (DMN), a neural hub implicated in  
553 autobiographical memory (Buckner & Carroll, 2007), and self-referential processing  
554 (Raichle et al., 2001). Weaker resting-state functional connectivity between the right  
555 amygdala and PCC has previously been linked to greater reappraisal success (i.e.,  
556 effective down-regulation of negative emotion) in young adults (Uchida et al., 2015),  
557 whereas increased amygdala-PCC resting-state functional connectivity has been  
558 observed following exposure to an acute stressor (Veer et al., 2011). More recently,  
559 Baez-Lugo et al. (2021) reported that greater right amygdala-PCC functional  
560 connectivity following exposure to videos containing highly negative emotional content  
561 (i.e., people suffering) was significantly correlated with higher rumination, anxiety and



562 stress in elderly individuals (Baez-Lugo et al., 2021). Critically, those older adults who  
563 self-reported more frequent negative thoughts while watching the negative emotional  
564 videos were those who also exhibited stronger right amygdala-PCC connectivity.  
565 Considering that lower HRV has been linked to both increased rumination and emotion  
566 dysregulation (Visted et al., 2017; Williams et al., 2017), the observation of weaker  
567 right amygdala-PCC connectivity in old and young adults with higher HRV in our study  
568 may therefore reflect an increased ability to effectively engage with the emotion  
569 regulation task at hand.

570         Finally, we found that older adults with higher HRV exhibited stronger functional  
571 connectivity between the amygdala and right vIPFC in a reappraisal context. This  
572 finding is particularly interesting since Sakaki et al. (2016) reported a similar  
573 association between HRV and amygdala-vIPFC connectivity during rest in young, but  
574 not old adults, suggesting that young adults with higher HRV were more likely to  
575 spontaneously recruit neural regions involved in explicit emotion regulation. The vIPFC  
576 has increasingly been identified as a pivotal neural region involved in emotion  
577 regulatory processes (Wager et al., 2008; Zhao et al., 2021), and is an area in which  
578 age-related differences have been reported during reappraisal (Opitz et al., 2012;  
579 Winecoff et al., 2011). The vIPFC, and lateral prefrontal cortex more broadly, is  
580 particularly vulnerable to structural and functional atrophy in healthy ageing (Fjell et  
581 al., 2009; Raz et al., 2004). The present finding suggests that higher HRV in older age,  
582 at least in a voluntary emotion regulation context, may support increased engagement,  
583 and possibly functional preservation, of lateral prefrontal cortex, specifically the right  
584 vIPFC, facilitating effective response inhibition and reappraisal of negative emotions.  
585 Although the left vIPFC has been more frequently reported in reappraisal studies  
586 (Berboth & Morawetz, 2021; Buhle et al., 2014), involvement of the right vIPFC here

587 may be characterised by dominance of the right hemisphere in supporting inhibitory-  
588 related processes for affective, cognitive and physiological regulation more broadly  
589 (Lane et al., 2009; Thayer et al., 2009b, 2012). Irrespective of any laterality, our  
590 findings build on the extant literature on prefrontal mechanisms in reappraisal by  
591 highlighting that elevated HRV is associated with positive coupling between the  
592 amygdala and vIPFC, which may have implications for psychological wellbeing and  
593 resilience in later life.

594         A few important limitations should be considered when interpreting our findings.  
595 Our sample comprised a larger pool of old relative to young adults, leading to an  
596 unequal age distribution. Although age was included as a predictor in our regression  
597 models, the small sample of young adults rendered any findings specific to the young  
598 group as possibly spurious and requiring replication in a larger sample. Furthermore,  
599 HRV was derived from a finger pulse oximeter whilst participants were lying down in  
600 the scanner and whilst engaging in emotion-related tasks, predominantly reappraisal.  
601 Both factors have previously been shown to elevate heart rate and HRV (Butler et al.,  
602 2006; Cacioppo et al., 1994), and the use of photoplethysmography to derive HRV  
603 metrics, especially RMSSD (Schumann et al., 2021b), could have further resulted in a  
604 higher HRV estimate. Additionally, other lifestyle factors known to influence HRV  
605 measures, including smoking status, general fitness/activity level, caffeine intake and  
606 body mass index (Hayano et al., 1990; Karason et al., 1999; Sammito & Böckelmann,  
607 2016) were not obtained, therefore we cannot rule out the influence of these factors  
608 on the current findings. Future research should aim to acquire reliable heart rate  
609 recordings to derive HRV metrics both inside and outside of the scanner (Schumann  
610 et al., 2021b), alongside potential aggregation of HRV measures across contexts, to

611 capture variance that more strongly represents 'trait-like' HRV (see Bertsch et al.,  
612 2012).

613 Whilst our study augments prior findings which have heavily relied on  
614 associations between HRV and functional connectivity during rest by assessing heart-  
615 brain function in an active emotion regulatory context, the current study and the  
616 majority of prior work have typically relied on relatively static functional connectivity  
617 techniques. Although a few studies have examined transient HRV changes and  
618 functional connectivity using dynamic functional connectivity (dFC) techniques such  
619 as the sliding window approach (Chand et al., 2020; Chang et al., 2013; Schumann et  
620 al., 2021a), this method is limited by its reliance on arbitrary selection of truncated time  
621 windows to assess both functional connectivity and HRV, with the latter particularly  
622 affected by the shorter duration of the measurement period (Shaffer & Ginsberg, 2017;  
623 TaskForce, 1996). It would therefore be fruitful for future research to employ novel and  
624 alternative dFC methods that overcome existing constraints (e.g., co-activation pattern  
625 analysis; Liu et al., 2013, 2018) to determine associations between HRV and dynamic  
626 neural networks underlying adaptive and flexible regulation across the lifespan.

627 In conclusion, the current study extends prior resting-state findings by  
628 highlighting that HRV covaries with amygdala-cortical functional connectivity in the  
629 context of a voluntary emotion regulation task. Particularly, whilst our findings partially  
630 replicate amygdala-mPFC connectivity during rest to be coupled to HRV, the task-  
631 based covariation between functional connectivity of amygdala-vIPFC and amygdala-  
632 PCC and HRV provide further, and more direct, support of the NIM. Furthermore, the  
633 findings support the notion that HRV is linked to neural mechanisms that facilitate  
634 adaptive emotion regulation, which could have implications for wellbeing and  
635 resilience in later life. Collectively, our findings highlight the importance of assessing

636 neurovisceral circuitry during active regulatory contexts to further elucidate core neural  
637 mechanisms involved in supporting adaptive self-regulation as a function of HRV more  
638 broadly.

639

640

#### **Data Availability Statement**

641 The MRI data that support the findings of this study are openly available on  
642 OpenNeuro: <https://doi.org/10.18112/openneuro.ds002620.v1.0.0>. The pulse data,  
643 processing and analysis scripts that support this study are openly available on the  
644 Open Science Framework (OSF): <https://osf.io/6zdph/>.

645

646

#### **Acknowledgements**

647 The authors would like to thank Karis Colyer Patel and Laura Bucher for their  
648 assistance with processing the pulse data, Shan Shen for MRI support and help in  
649 MRI data acquisition, and all participants for devoting their time to our research. This  
650 research was supported by grants from the Biotechnology and Biological Sciences  
651 Research Council (BB/J009539/1 and BB/L02697X/1) awarded to Carien van  
652 Reekum.

653

654

#### **Conflict of Interest Statement**

655 Declarations of interest: none. The authors declare no conflict of interest.

656

657  
658  
659  
660  
661  
662  
663  
664  
665  
666  
667  
668  
669  
670  
671  
672  
673  
674  
675  
676  
677  
678  
679  
680

## References

- Agelink, M. W., Malessa, R., Baumann, B., Majewski, T., Akila, F., Zeit, T., & Ziegler, D. (2001). Standardized tests of heart rate variability: normal ranges obtained from 309 healthy humans, and effects of age, gender, and heart rate. *Clinical Autonomic Research*, 11(2), 99-108. <https://doi.org/10.1007/BF02322053>
- Aldao, A., Sheppes, G., & Gross, J. J. (2015). Emotion Regulation Flexibility. *Cognitive Therapy and Research*, 39(3), 263-278. <https://doi.org/10.1007/s10608-014-9662-4>
- Appelhans, B. M., & Luecken, L. J. (2006). Heart Rate Variability as an Index of Regulated Emotional Responding. *Review of General Psychology*, 10(3), 229-240. <https://doi.org/10.1037/1089-2680.10.3.229>
- Baas, D., Aleman, A., & Kahn, R. S. (2004). Lateralization of amygdala activation: a systematic review of functional neuroimaging studies. *Brain Research Reviews*, 45(2), 96-103. <https://doi.org/10.1016/j.brainresrev.2004.02.004>
- Baez-Lugo, S., Deza-Araujo, Y.I., Colette, F., Vuilleumier, P., Klimecki, O., Meditation Research, G. (2021). *Exposure to negative socio-emotional events induces sustained alteration of resting-state brain networks in the elderly*. ResearchSquare [pre-print]. <https://doi.org/10.21203/rs.3.rs-91196/v2>
- Beckmann, C. F., & Smith, S. M. (2004). Probabilistic independent component analysis for functional magnetic resonance imaging. *IEEE Transactions on Medical Imaging*, 23(2), 137-152. <https://doi.org/10.1109/TMI.2003.822821>
- Benarroch, E. E. (1993). The Central Autonomic Network: Functional Organization, Dysfunction, and Perspective. *Mayo Clinic Proceedings*, 68, 988–1001. [https://doi.org/10.1016/S0025-6196\(12\)62272-1](https://doi.org/10.1016/S0025-6196(12)62272-1)

- 681 Berboth, S., & Morawetz, C. (2021). Amygdala-prefrontal connectivity during emotion  
682 regulation: A meta-analysis of psychophysiological  
683 interactions. *Neuropsychologia*, 153, 107767.  
684 <https://doi.org/10.1016/j.neuropsychologia.2021.107767>
- 685 Berntson, G. G., Bigger, J. T., Eckberg, D. L., Grossman, P., Kaufmann, P. G., Malik,  
686 M., et al. (1997). Heart rate variability: Origins, methods, and interpretive  
687 caveats. *Psychophysiology*, 34(6), 623-648. [https://doi.org/10.1111/j.1469-](https://doi.org/10.1111/j.1469-8986.1997.tb02140.x)  
688 [8986.1997.tb02140.x](https://doi.org/10.1111/j.1469-8986.1997.tb02140.x)
- 689 Bertsch, K., Hagemann, D., Naumann, E., Schächinger, H., & Schulz, A. (2012).  
690 Stability of heart rate variability indices reflecting parasympathetic  
691 activity. *Psychophysiology*, 49(5), 672-682. [https://doi.org/10.1111/j.1469-](https://doi.org/10.1111/j.1469-8986.2011.01341.x)  
692 [8986.2011.01341.x](https://doi.org/10.1111/j.1469-8986.2011.01341.x)
- 693 Buckner, R. L., & Carroll, D. C. (2007). Self-projection and the brain. *Trends in*  
694 *Cognitive Sciences*, 11(2), 49-57. <https://doi.org/10.1016/j.tics.2006.11.004>
- 695 Buhle, J. T., Silvers, J. A., Wager, T. D., Lopez, R., Onyemekwu, C., Kober, H., ... &  
696 Ochsner, K. N. (2014). Cognitive Reappraisal of Emotion: A Meta-Analysis of  
697 Human Neuroimaging Studies. *Cerebral Cortex*, 24(11), 2981-2990.  
698 <https://doi.org/10.1093/cercor/bht154>
- 699 Butler, E. A., Wilhelm, F. H., & Gross, J. J. (2006). Respiratory sinus arrhythmia,  
700 emotion, and emotion regulation during social  
701 interaction. *Psychophysiology*, 43(6), 612-622. [https://doi.org/10.1111/j.1469-](https://doi.org/10.1111/j.1469-8986.2006.00467.x)  
702 [8986.2006.00467.x](https://doi.org/10.1111/j.1469-8986.2006.00467.x)
- 703 Cacioppo, J.T., Berntson, G. G., Binkley, P. F., Quigley, K. S., Uchino, B. N., &  
704 Fieldstone, A. (1994). Autonomic Cardiac Control. II. Noninvasive indices and

- 705 basal response as revealed by autonomic blockades. *Psychophysiology*,  
706 31(6), 586-598. <https://doi.org/10.1111/j.1469-8986.1994.tb02351.x>
- 707 Cao, H., Chén, O. Y., Chung, Y., Forsyth, J. K., McEwen, S. C., Gee, D. G., ... &  
708 Cannon, T. D. (2018). Cerebello-thalamo-cortical hyperconnectivity as a state-  
709 independent functional neural signature for psychosis prediction and  
710 characterization. *Nature Communications*, 9(1), 1-9.  
711 <https://doi.org/10.1038/s41467-018-06350-7>
- 712 Chand, T., Li, M., Jamalabadi, H., Wagner, G., Lord, A., Alizadeh, S., ... & Sen, Z. D.  
713 (2020). Heart Rate Variability as an Index of Differential Brain Dynamics at  
714 Rest and After Acute Stress Induction. *Frontiers in Neuroscience*, 14, 645.  
715 <https://doi.org/10.3389/fnins.2020.00645>
- 716 Chang, C., Metzger, C. D., Glover, G. H., Duyn, J. H., Heinze, H. J., & Walter, M.  
717 (2013). Association between heart rate variability and fluctuations in resting-  
718 state functional connectivity. *NeuroImage*, 68, 93-104.  
719 <https://doi.org/10.1016/j.neuroimage.2012.11.038>
- 720 Chen, P. Y., Chiou, J. M., Yang, Y. F., Chen, Y. T., Hsieh, H. L., Chang, Y. L., &  
721 Tseng, W. Y. I. (2016). Heterogeneous Aging Effects on Functional  
722 Connectivity in Different Cortical Regions: A Resting-State Functional MRI  
723 Study Using Functional Data Analysis. *PloS one*, 11(9), e0162028.  
724 <https://doi.org/10.1371/journal.pone.0162028>
- 725 Cho, J. W., Korchmaros, A., Vogelstein, J. T., Milham, M. P., & Xu, T. (2021). Impact  
726 of concatenating fMRI data on reliability for functional  
727 connectomics. *NeuroImage*, 226, 117549.  
728 <https://doi.org/10.1016/j.neuroimage.2020.117549>

- 729 Cole, M. W., Ito, T., Schultz, D., Mill, R., Chen, R., & Cocuzza, C. (2019). Task  
730 activations produce spurious but systematic inflation of task functional  
731 connectivity estimates. *NeuroImage*, 189, 1-18.  
732 <https://doi.org/10.1016/j.neuroimage.2018.12.054>
- 733 Cox, R. W. (1996). AFNI: Software for Analysis and Visualization of Functional  
734 Magnetic Resonance Neuroimages. *Computers and Biomedical*  
735 *Research*, 29(3), 162-173. <https://doi.org/10.1006/cbmr.1996.0014>
- 736 Finn, E. S. (2021). Is it time to put rest to rest?. *Trends in Cognitive*  
737 *Sciences*, 25(12), 1021-1032. <https://doi.org/10.1016/j.tics.2021.09.005>
- 738 Finn, E. S., & Bandettini, P. A. (2021). Movie-watching outperforms rest for functional  
739 connectivity-based prediction of behavior. *NeuroImage*, 235, 117963.  
740 <https://doi.org/10.1016/j.neuroimage.2021.117963>
- 741 Fjell, A. M., Westlye, L. T., Amlien, I., Espeseth, T., Reinvang, I., Raz, N., ... &  
742 Walhovd, K. B. (2009). High Consistency of Regional Cortical Thinning in  
743 Aging across Multiple Samples. *Cerebral Cortex*, 19(9), 2001-2012.  
744 <https://doi.org/10.1093/cercor/bhn232>
- 745 Griffanti, L., Douaud, G., Bijsterbosch, J., Evangelisti, S., Alfaro-Almagro, F.,  
746 Glasser, M. F., ... & Smith, S. M. (2017). Hand classification of fMRI ICA noise  
747 components. *NeuroImage*, 154, 188-205.  
748 <https://doi.org/10.1016/j.neuroimage.2016.12.036>
- 749 Grossman, P., & Taylor, E. W. (2007). Toward understanding respiratory sinus  
750 arrhythmia: Relations to cardiac vagal tone, evolution and biobehavioral  
751 functions. *Biological Psychology*, 74(2), 263-285.  
752 <https://doi.org/10.1016/j.biopsycho.2005.11.014>



- 753 Hayano, J., Yamada, M., Sakakibara, Y., Fujinami, T., Yokoyama, K., Watanabe, Y.,  
754 & Takata, K. (1990). Short-and long-term effects of cigarette smoking on heart  
755 rate variability. *The American Journal of Cardiology*, 65(1), 84-88.  
756 [https://doi.org/10.1016/0002-9149\(90\)90030-5](https://doi.org/10.1016/0002-9149(90)90030-5)
- 757 Hill, L. K., Siebenbrock, A., Sollers, J. J., & Thayer, J. F. (2009). Are all measures  
758 created equal? Heart rate variability and respiration – biomed 2009. *Biomed.*  
759 *Sci. Instrum*, 45, 71-76.
- 760 Jenkinson, M., Bannister, P., Brady, M., & Smith, S. (2002). Improved Optimization  
761 for the Robust and Accurate Linear Registration and Motion Correction of  
762 Brain Images. *NeuroImage*, 17(2), 825-841. [https://doi.org/10.1016/s1053-](https://doi.org/10.1016/s1053-8119(02)91132-8)  
763 [8119\(02\)91132-8](https://doi.org/10.1016/s1053-8119(02)91132-8)
- 764 Jenkinson, M., Beckmann, C. F., Behrens, T. E., Woolrich, M. W., & Smith, S. M.  
765 (2012). FSL. *NeuroImage*, 62(2), 782-790.  
766 <https://doi.org/10.1016/j.neuroimage.2011.09.015>
- 767 Karason, K., Mølgaard, H., Wikstrand, J., & Sjöström, L. (1999). Heart rate variability  
768 in obesity and the effect of weight loss. *The American Journal of*  
769 *Cardiology*, 83(8), 1242-1247. [https://doi.org/10.1016/S0002-9149\(99\)00066-](https://doi.org/10.1016/S0002-9149(99)00066-1)  
770 [1](https://doi.org/10.1016/S0002-9149(99)00066-1)
- 771 Kleiger, R. E., Stein, P. K., & Bigger, J. T. Jr. (2005). Heart Rate Variability:  
772 Measurement and Clinical Utility. *Annals of Noninvasive*  
773 *Electrocardiology*, 10(1), 88-101. [https://doi.org/10.1111/j.1542-](https://doi.org/10.1111/j.1542-474X.2005.10101.x)  
774 [474X.2005.10101.x](https://doi.org/10.1111/j.1542-474X.2005.10101.x)
- 775 Kogan, A., Gruber, J., Shallcross, A. J., Ford, B. Q., & Mauss, I. B. (2013). Too much  
776 of a good thing? Cardiac vagal tone's nonlinear relationship with well-  
777 being. *Emotion*, 13(4), 599-604. <https://doi.org/10.1037/a0032725>

- 778 Kraus, B. T., Perez, D., Ladwig, Z., Seitzman, B. A., Dworetzky, A., Petersen, S. E.,  
779 & Gratton, C. (2021). Network variants are similar between task and rest  
780 states. *NeuroImage*, 229, 117743.  
781 <https://doi.org/10.1016/j.neuroimage.2021.117743>
- 782 Kumral, D., Schaare, H. L., Beyer, F., Reinelt, J., Uhlig, M., Liem, F., ... & Gaebler,  
783 M. (2019). The age-dependent relationship between resting heart rate  
784 variability and functional brain connectivity. *NeuroImage*, 185, 521-533.  
785 <https://doi.org/10.1016/j.neuroimage.2018.10.027>
- 786 Laborde, S., Mosley, E., & Mertgen, A. (2018). Vagal Tank Theory: The Three Rs of  
787 Cardiac Vagal Control Functioning—Resting, Reactivity, and  
788 Recovery. *Frontiers in Neuroscience*, 12, 458.  
789 <https://doi.org/10.3389/fnins.2018.00458>
- 790 Lane, R. D., McRae, K., Reiman, E. M., Chen, K., Ahern, G. L., & Thayer, J. F.  
791 (2009). Neural correlates of heart rate variability during  
792 emotion. *NeuroImage*, 44(1), 213-222.  
793 <https://doi.org/10.1016/j.neuroimage.2008.07.056>
- 794 Lang, P.J., Bradley, M.M., & Cuthbert, B.N. (2008). *International affective picture*  
795 *system (IAPS): Affective ratings of pictures and instruction manual*. (Technical  
796 Report A-8). University of Florida, Gainesville, FL.
- 797 Lee, H., Heller, A. S., Van Reekum, C. M., Nelson, B., & Davidson, R. J. (2012).  
798 Amygdala–prefrontal coupling underlies individual differences in emotion  
799 regulation. *NeuroImage*, 62(3), 1575-1581.  
800 <https://doi.org/10.1016/j.neuroimage.2012.05.044>

- 801 Lehrer, P. M., & Gevirtz, R. (2014). Heart rate variability biofeedback: how and why  
802 does it work?. *Frontiers in Psychology*, 756.  
803 <https://doi.org/10.3389/fpsyg.2014.00756>
- 804 Liu, X., Chang, C., & Duyn, J. H. (2013). Decomposition of spontaneous brain  
805 activity into distinct fMRI co-activation patterns. *Frontiers in Systems*  
806 *Neuroscience*, 7, 101. <https://doi.org/10.3389/fnsys.2013.00101>
- 807 Liu, X., Zhang, N., Chang, C., & Duyn, J. H. (2018). Co-activation patterns in resting-  
808 state fMRI signals. *NeuroImage*, 180, 485-494.  
809 <https://doi.org/10.1016/j.neuroimage.2018.01.041>
- 810 Lloyd, W. K., Morriss, J., Macdonald, B., Joanknecht, K., Nihouarn, J., & Van  
811 Reekum, C. M. (2021). Longitudinal change in executive function is  
812 associated with impaired top-down frontolimbic regulation during reappraisal  
813 in older adults. *NeuroImage*, 225, 117488.  
814 <https://doi.org/10.1016/j.neuroimage.2020.117488>
- 815 [dataset] Lloyd, W. K., Morriss, J., Macdonald, B., Joanknecht, K., Nihouarn, J., &  
816 Van Reekum, C. M. (2021). Emotion regulation in the Ageing Brain, University  
817 of Reading, BBSRC. Version 1. OpenNeuro.  
818 <https://doi.org/10.18112/openneuro.ds002620.v1.0.0>
- 819 Maier, S. U., & Hare, T. A. (2017). Higher Heart-Rate Variability Is Associated with  
820 Ventromedial Prefrontal Cortex Activity and Increased Resistance to  
821 Temptation in Dietary Self-Control Challenges. *Journal of*  
822 *Neuroscience*, 37(2), 446-455. [https://doi.org/10.1523/JNEUROSCI.2815-](https://doi.org/10.1523/JNEUROSCI.2815-16.2016)  
823 [16.2016](https://doi.org/10.1523/JNEUROSCI.2815-16.2016)

- 824 Mather, M., & Thayer, J. F. (2018). How heart rate variability affects emotion  
825 regulation brain networks. *Current Opinion in Behavioral Sciences*, 19, 98-  
826 104. <https://doi.org/10.1016/j.cobeha.2017.12.017>
- 827 Morawetz, C., Riedel, M. C., Salo, T., Berboth, S., Eickhoff, S. B., Laird, A. R., &  
828 Kohn, N. (2020). Multiple large-scale neural networks underlying emotion  
829 regulation. *Neuroscience & Biobehavioral Reviews*, 116, 382-395.  
830 <https://doi.org/10.1016/j.neubiorev.2020.07.001>
- 831 Murphy, K., Birn, R. M., Handwerker, D. A., Jones, T. B., & Bandettini, P. A. (2009).  
832 The impact of global signal regression on resting state correlations: are anti-  
833 correlated networks introduced?. *NeuroImage*, 44(3), 893-905.  
834 <https://doi.org/10.1016/j.neuroimage.2008.09.036>
- 835 Murphy, K., & Fox, M. D. (2017). Towards a consensus regarding global signal  
836 regression for resting state functional connectivity MRI. *NeuroImage*, 154,  
837 169-173. <https://doi.org/10.1016/j.neuroimage.2016.11.052>
- 838 Nashiro, K., Min, J., Yoo, H. J., Cho, C., Bachman, S. L., Dutt, S., ... & Mather, M.  
839 (2022). *Increased coordination and responsivity of emotion-related brain*  
840 *regions with a heart rate variability biofeedback randomized trial*. medRxiv  
841 [pre-print]. <https://doi.org/10.1101/2021.09.28.21264206>
- 842 Opitz, P. C., Rauch, L. C., Terry, D. P., & Urry, H. L. (2012). Prefrontal mediation of  
843 age differences in cognitive reappraisal. *Neurobiology of Aging*, 33(4), 645-  
844 655. <https://doi.org/10.1016/j.neurobiolaging.2010.06.004>
- 845 Porges, S. W. (2007). The polyvagal perspective. *Biological Psychology*, 74(2), 116-  
846 143. <https://doi.org/10.1016/j.biopsycho.2006.06.009>

- 847 Porges, S. W. (2011). *The Polyvagal Theory: Neurophysiological Foundations of*  
848 *Emotions, Attachment, Communication, and Self-Regulation (Norton Series*  
849 *on Interpersonal Neurobiology)*. WW Norton & Company.
- 850 Raichle, M. E., MacLeod, A. M., Snyder, A. Z., Powers, W. J., Gusnard, D. A., &  
851 Shulman, G. L. (2001). A default mode of brain function. *Proceedings of the*  
852 *National Academy of Sciences*, 98(2), 676-682.  
853 <https://doi.org/10.1073/pnas.98.2.676>
- 854 Raz, N., Gunning-Dixon, F., Head, D., Rodrigue, K. M., Williamson, A., & Acker, J. D.  
855 (2004). Aging, sexual dimorphism, and hemispheric asymmetry of the  
856 cerebral cortex: replicability of regional differences in volume. *Neurobiology of*  
857 *Aging*, 25(3), 377-396. [https://doi.org/10.1016/S0197-4580\(03\)00118-0](https://doi.org/10.1016/S0197-4580(03)00118-0)
- 858 Russoniello, C. V., Zhirnov, Y. N., Pougatchev, V. I., & Gribkov, E. N. (2013). Heart  
859 rate variability and biological age: Implications for health and  
860 gaming. *Cyberpsychology, Behavior, and Social Networking*, 16(4), 302-308.  
861 <https://doi.org/10.1089/cyber.2013.1505>
- 862 Sakaki, M., Nga, L., & Mather, M. (2013). Amygdala Functional Connectivity with  
863 Medial Prefrontal Cortex at Rest Predicts the Positivity Effect in Older Adults'  
864 Memory. *Journal of Cognitive Neuroscience*, 25(8), 1206-1224.  
865 [https://doi.org/10.1162/jocn\\_a\\_00392](https://doi.org/10.1162/jocn_a_00392)
- 866 Sakaki, M., Yoo, H. J., Nga, L., Lee, T. H., Thayer, J. F., & Mather, M. (2016). Heart  
867 rate variability is associated with amygdala functional connectivity with MPFC  
868 across younger and older adults. *NeuroImage*, 139, 44-52.  
869 <https://doi.org/10.1016/j.neuroimage.2016.05.076>

- 870 Sammito, S., Böckelmann, I. (2016). Factors influencing heart rate variability.  
871 *International Cardiovascular Forum Journal*. 6, 18–22.  
872 <https://doi.org/10.17987/icfj.v6i0.242>
- 873 Schumann, A., De La Cruz, F., Köhler, S., Brotte, L., & Bär, K. J. (2021a). The  
874 Influence of Heart Rate Variability Biofeedback on Cardiac Regulation and  
875 Functional Brain Connectivity. *Frontiers in Neuroscience*, 15, 775.  
876 <https://doi.org/10.3389/fnins.2021.691988>
- 877 Schumann, A., Suttkus, S., & Bär, K. J. (2021b). Estimating Resting HRV during  
878 fMRI: A Comparison between Laboratory and Scanner  
879 Environment. *Sensors*, 21(22), 7663. <https://doi.org/10.3390/s21227663>
- 880 Shaffer, F., & Ginsberg, J. P. (2017). An Overview of Heart Rate Variability Metrics  
881 and Norms. *Frontiers in Public Health*, 5, 258.  
882 <https://doi.org/10.3389/fpubh.2017.00258>
- 883 Smith, S. M. (2002). Fast robust automated brain extraction. *Human Brain*  
884 *Mapping*, 17(3), 143-155. <https://doi.org/10.1002/hbm.10062>
- 885 Smith, S. M., Jenkinson, M., Woolrich, M. W., Beckmann, C. F., Behrens, T. E.,  
886 Johansen-Berg, H., ... & Matthews, P. M. (2004). Advances in functional and  
887 structural MR image analysis and implementation as FSL. *NeuroImage*, 23,  
888 S208-S219. <https://doi.org/10.1016/j.neuroimage.2004.07.051>
- 889 Smith, R., Thayer, J. F., Khalsa, S. S., & Lane, R. D. (2017). The hierarchical basis  
890 of neurovisceral integration. *Neuroscience & Biobehavioral Reviews*, 75, 274-  
891 296. <https://doi.org/10.1016/j.neubiorev.2017.02.003>
- 892 Steinfurth, E. C., Wendt, J., Geisler, F., Hamm, A. O., Thayer, J. F., & Koenig, J.  
893 (2018). Resting State Vagally-Mediated Heart Rate Variability Is Associated

- 894 With Neural Activity During Explicit Emotion Regulation. *Frontiers in*  
895 *Neuroscience*, 12, 794. <https://doi.org/10.3389/fnins.2018.00794>
- 896 Tarvainen, M. P., Niskanen, J. P., Lipponen, J. A., Ranta-Aho, P. O., & Karjalainen,  
897 P. A. (2014). Kubios HRV–Heart rate variability analysis software. *Computer*  
898 *Methods and Programs in Biomedicine*, 113(1), 210-220.  
899 <https://doi.org/10.1016/j.cmpb.2013.07.024>
- 900 Task Force of the European Society of Cardiology. (1996). Heart rate variability:  
901 standards of measurement, physiological interpretation and clinical  
902 use. *Circulation*, 93, 1043-1065.
- 903 Thayer, J. F., Åhs, F., Fredrikson, M., Sollers III, J. J., & Wager, T. D. (2012). A  
904 meta-analysis of heart rate variability and neuroimaging studies: Implications  
905 for heart rate variability as a marker of stress and health. *Neuroscience &*  
906 *Biobehavioral Reviews*, 36(2), 747-756.  
907 <https://doi.org/10.1016/j.neubiorev.2011.11.009>
- 908 Thayer, J. F., Hansen, A. L., Saus-Rose, E., & Johnsen, B. H. (2009a). Heart Rate  
909 Variability, Prefrontal Neural Function, and Cognitive Performance: The  
910 Neurovisceral Integration Perspective on Self-regulation, Adaptation, and  
911 Health. *Annals of Behavioral Medicine*, 37(2), 141-153.  
912 <https://doi.org/10.1007/s12160-009-9101-z>
- 913 Thayer, J. F., & Lane, R. D. (2000). A model of neurovisceral integration in emotion  
914 regulation and dysregulation. *Journal of Affective Disorders*, 61(3), 201-216.  
915 [https://doi.org/10.1016/S0165-0327\(00\)00338-4](https://doi.org/10.1016/S0165-0327(00)00338-4)
- 916 Thayer, J. F., & Lane, R. D. (2009). Claude Bernard and the heart–brain connection:  
917 Further elaboration of a model of neurovisceral integration. *Neuroscience &*



- 918 *Biobehavioral Reviews*, 33(2), 81-88.
- 919 <https://doi.org/10.1016/j.neubiorev.2008.08.004>
- 920 Thayer, J. F., Sollers III, J. J., Labiner, D. M., Weinand, M., Herring, A. M., Lane, R.
- 921 D., & Ahern, G. L. (2009b). Age-related differences in prefrontal control of
- 922 heart rate in humans: A pharmacological blockade study. *International Journal*
- 923 *of Psychophysiology*, 72(1), 81-88.
- 924 <https://doi.org/10.1016/j.ijpsycho.2008.04.007>
- 925 Thompson, R. A. (1994). Emotion regulation: A Theme in Search of
- 926 Definition. *Monographs of the Society for Research in Child Development*, 25-
- 927 52. <https://doi.org/10.2307/1166137>
- 928 Uchida, M., Biederman, J., Gabrieli, J. D., Micco, J., de Los Angeles, C., Brown, A.,
- 929 ... & Whitfield-Gabrieli, S. (2015). Emotion regulation ability varies in relation
- 930 to intrinsic functional brain architecture. *Social Cognitive and Affective*
- 931 *Neuroscience*, 10(12), 1738-1748. <https://doi.org/10.1093/scan/nsv059>
- 932 Uddin, L. Q. (2017). Mixed Signals: On Separating Brain Signal from Noise. *Trends*
- 933 *in Cognitive Sciences*, 21(6), 405-406.
- 934 <https://doi.org/10.1016/j.tics.2017.04.002>
- 935 van Reekum, C. M., Johnstone, T., Urry, H. L., Thurow, M. E., Schaefer, H. S.,
- 936 Alexander, A. L., & Davidson, R. J. (2007). Gaze fixations predict brain
- 937 activation during the voluntary regulation of picture-induced negative
- 938 affect. *NeuroImage*, 36(3), 1041-1055.
- 939 <https://doi.org/10.1016/j.neuroimage.2007.03.052>
- 940 Veer, I. M., Oei, N. Y., Spinhoven, P., van Buchem, M. A., Elzinga, B. M., &
- 941 Rombouts, S. A. (2011). Beyond acute social stress: Increased functional
- 942 connectivity between amygdala and cortical midline



- 943 structures. *NeuroImage*, 57(4), 1534-1541.
- 944 <https://doi.org/10.1016/j.neuroimage.2011.05.074>
- 945 Visted, E., Sørensen, L., Osnes, B., Svendsen, J. L., Binder, P. E., & Schanche, E.
- 946 (2017). The Association between Self-Reported Difficulties in Emotion
- 947 Regulation and Heart Rate Variability: The Salient Role of Not Accepting
- 948 Negative Emotions. *Frontiers in Psychology*, 8, 328.
- 949 <https://doi.org/10.3389/fpsyg.2017.00328>
- 950 Wager, T. D., Davidson, M. L., Hughes, B. L., Lindquist, M. A., & Ochsner, K. N.
- 951 (2008). Prefrontal-subcortical pathways mediating successful emotion
- 952 regulation. *Neuron*, 59(6), 1037-1050.
- 953 <https://doi.org/10.1016/j.neuron.2008.09.006>
- 954 Williams, D. P., Feeling, N. R., Hill, L. K., Spangler, D. P., Koenig, J., & Thayer, J. F.
- 955 (2017). Resting Heart Rate Variability, Facets of Rumination and Trait
- 956 Anxiety: Implications for the Perseverative Cognition Hypothesis. *Frontiers in*
- 957 *Human Neuroscience*, 11, 520. <https://doi.org/10.3389/fnhum.2017.00520>
- 958 Winecoff, A., LaBar, K. S., Madden, D. J., Cabeza, R., & Huettel, S. A. (2011).
- 959 Cognitive and neural contributors to emotion regulation in aging. *Social*
- 960 *Cognitive and Affective Neuroscience*, 6(2), 165-176.
- 961 <https://doi.org/10.1093/scan/nsq030>
- 962 Woolrich, M. W., Behrens, T. E., Beckmann, C. F., Jenkinson, M., & Smith, S. M.
- 963 (2004). Multilevel linear modelling for fMRI group analysis using Bayesian
- 964 inference. *NeuroImage*, 21(4), 1732-1747.
- 965 <https://doi.org/10.1016/j.neuroimage.2003.12.023>
- 966 Woolrich, M. W., Jbabdi, S., Patenaude, B., Chappell, M., Makni, S., Behrens, T., ...
- 967 & Smith, S. M. (2009). Bayesian analysis of neuroimaging data in

- 968 FSL. *NeuroImage*, 45(1), S173-S186.
- 969 <https://doi.org/10.1016/j.neuroimage.2008.10.055>
- 970 Woolrich, M. W., Ripley, B. D., Brady, M., & Smith, S. M. (2001). Temporal  
971 Autocorrelation in Univariate Linear Modeling of FMRI  
972 Data. *NeuroImage*, 14(6), 1370-1386. <https://doi.org/10.1006/nimg.2001.0931>
- 973 Worsley, K. J. (2001). Statistical analysis of activation images. In: Jezzard P.,  
974 Matthews P.M., & Smith S.M. (Eds.). *Functional MRI: An Introduction to*  
975 *Methods* (pp. 251-70). Oxford University Press.
- 976 Yang, M., Tsai, S. J., & Li, C. S. R. (2020). Concurrent amygdalar and ventromedial  
977 prefrontal cortical responses during emotion processing: a meta-analysis of  
978 the effects of valence of emotion and passive exposure versus active  
979 regulation. *Brain Structure and Function*, 225(1), 345-363.  
980 <https://doi.org/10.1007/s00429-019-02007-3>
- 981 Zhang, Y., Brady, M., & Smith, S. (2001). Segmentation of brain MR images through  
982 a hidden Markov random field model and the expectation-maximization  
983 algorithm. *IEEE Transactions on Medical Imaging*, 20(1), 45-57.  
984 <https://doi.org/10.1109/42.906424>
- 985 Zhao, J., Mo, L., Bi, R., He, Z., Chen, Y., Xu, F., ... & Zhang, D. (2021). The VLPFC  
986 versus the DLPFC in Downregulating Social Pain Using Reappraisal and  
987 Distraction Strategies. *Journal of Neuroscience*, 41(6), 1331-1339.  
988 <https://doi.org/10.1523/JNEUROSCI.1906-20.2020>
